# Supplementary material
Source: MDPI journal article supplement (https://www.mdpi.com/2813-4524/1/1/4)
Supplement: s1 [file s1]

Archive with 2 entries (2 files):
- Supplementary fileS1_english translation of SDM-C-Japanese(care stuff).pdf
- Supplementary fileS2_english translation of the Japanese version of PREM modified for care provider.pdf
