# Supplementary material
Source: MDPI journal article supplement (https://www.mdpi.com/2813-4524/1/1/4)
Supplement: s1 [file s1 › Supplementary fileS1_english translation of SDM-C-Japanese(care stuff).pdf]

## Shared decision-making questionnaire on daily living care

●Please describe the purpose of discussion about care with the recipients of care.

(Ex: independent elimination, wishes to receive care at home, oral intake of solids, positioning support, and so on)

●What kind of care was decided for the patient?

(Ex: rehabilitation for transfer to the bathroom on outpatient basis, pain control, swallowing rehabilitation, use of cushions, and so on)

### Discussion on the care objectives

Please select the option that corresponds best with a ☒ for the nine items below.

| 1. I clearly stated to the recipient of care that decision-making related to care is needed. |                          |                          |                          |                          |                          |
|----------------------------------------------------------------------------------------------|--------------------------|--------------------------|--------------------------|--------------------------|--------------------------|
| completely disagree                                                                          | strongly disagree        | somewhat disagree        | somewhat agree           | strongly agree           | completely agree         |
| <input type="checkbox"/>                                                                     | <input type="checkbox"/> | <input type="checkbox"/> | <input type="checkbox"/> | <input type="checkbox"/> | <input type="checkbox"/> |

| 2. I strove to know how the recipients of care wanted to be involved in decision-making. |                          |                          |                          |                          |                          |
|------------------------------------------------------------------------------------------|--------------------------|--------------------------|--------------------------|--------------------------|--------------------------|
| completely disagree                                                                      | strongly disagree        | somewhat disagree        | somewhat agree           | strongly agree           | completely agree         |
| <input type="checkbox"/>                                                                 | <input type="checkbox"/> | <input type="checkbox"/> | <input type="checkbox"/> | <input type="checkbox"/> | <input type="checkbox"/> |

| 3. I told the recipients of care of the varying care options available. |                          |                          |                          |                          |                          |
|-------------------------------------------------------------------------|--------------------------|--------------------------|--------------------------|--------------------------|--------------------------|
| completely disagree                                                     | strongly disagree        | somewhat disagree        | somewhat agree           | strongly agree           | completely agree         |
| <input type="checkbox"/>                                                | <input type="checkbox"/> | <input type="checkbox"/> | <input type="checkbox"/> | <input type="checkbox"/> | <input type="checkbox"/> |

| 4. I clearly explained the recipients of care about the advantages and disadvantages of the various options. |                          |                          |                          |                          |                          |
|--------------------------------------------------------------------------------------------------------------|--------------------------|--------------------------|--------------------------|--------------------------|--------------------------|
| completely disagree                                                                                          | strongly disagree        | somewhat disagree        | somewhat agree           | strongly agree           | completely agree         |
| <input type="checkbox"/>                                                                                     | <input type="checkbox"/> | <input type="checkbox"/> | <input type="checkbox"/> | <input type="checkbox"/> | <input type="checkbox"/> |

| 5. I provided thorough support so that the recipients of care can understand the information I explained. |                          |                          |                          |                          |                          |
|-----------------------------------------------------------------------------------------------------------|--------------------------|--------------------------|--------------------------|--------------------------|--------------------------|
| completely disagree                                                                                       | strongly disagree        | somewhat disagree        | somewhat agree           | strongly agree           | completely agree         |
| <input type="checkbox"/>                                                                                  | <input type="checkbox"/> | <input type="checkbox"/> | <input type="checkbox"/> | <input type="checkbox"/> | <input type="checkbox"/> |

↓Continued on the next page ↓

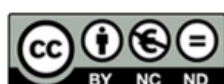

**Supplementary file 1**  
**English translation of SDM-C-Japanese (care stuff)**

|                                                                              |                          |                          |                          |                          |                          |
|------------------------------------------------------------------------------|--------------------------|--------------------------|--------------------------|--------------------------|--------------------------|
| <b>6. I asked the recipients of care about which options they preferred.</b> |                          |                          |                          |                          |                          |
| completely disagree                                                          | strongly disagree        | somewhat disagree        | somewhat agree           | strongly agree           | completely agree         |
| <input type="checkbox"/>                                                     | <input type="checkbox"/> | <input type="checkbox"/> | <input type="checkbox"/> | <input type="checkbox"/> | <input type="checkbox"/> |

|                                                                                                     |                          |                          |                          |                          |                          |
|-----------------------------------------------------------------------------------------------------|--------------------------|--------------------------|--------------------------|--------------------------|--------------------------|
| <b>7. The recipients of care and I compared and thoroughly considered the various care options.</b> |                          |                          |                          |                          |                          |
| completely disagree                                                                                 | strongly disagree        | somewhat disagree        | somewhat agree           | strongly agree           | completely agree         |
| <input type="checkbox"/>                                                                            | <input type="checkbox"/> | <input type="checkbox"/> | <input type="checkbox"/> | <input type="checkbox"/> | <input type="checkbox"/> |

|                                                                            |                          |                          |                          |                          |                          |
|----------------------------------------------------------------------------|--------------------------|--------------------------|--------------------------|--------------------------|--------------------------|
| <b>8. The recipients of care and I selected the care options together.</b> |                          |                          |                          |                          |                          |
| completely disagree                                                        | strongly disagree        | somewhat disagree        | somewhat agree           | strongly agree           | completely agree         |
| <input type="checkbox"/>                                                   | <input type="checkbox"/> | <input type="checkbox"/> | <input type="checkbox"/> | <input type="checkbox"/> | <input type="checkbox"/> |

|                                                                                |                          |                          |                          |                          |                          |
|--------------------------------------------------------------------------------|--------------------------|--------------------------|--------------------------|--------------------------|--------------------------|
| <b>9. The recipients of care and I agreed on how to proceed with the care.</b> |                          |                          |                          |                          |                          |
| completely disagree                                                            | strongly disagree        | somewhat disagree        | somewhat agree           | strongly agree           | completely agree         |
| <input type="checkbox"/>                                                       | <input type="checkbox"/> | <input type="checkbox"/> | <input type="checkbox"/> | <input type="checkbox"/> | <input type="checkbox"/> |

This is the end of the questionnaire. Thank you very much for your participation.

Please send inquiries related to this questionnaire to the contact details below:

Secretariat of the Department of Home Care and Regional Liaison Promotion, National Center for Geriatrics and Gerontology

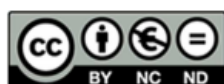

This work is licensed under the Creative Commons Attribution-NonCommercial-NoDerivatives 4.0 International License. To view a copy of the license, visit <https://creativecommons.org/licenses/by-nc-nd/4.0/legalcode>  
January 2019, adapted by Yuko Goto & Hisayuki Miura (National Center for Geriatrics and Gerontology, Japan)  
Adaptation of the original “9-item Shared Decision Making Questionnaire (SDM-Q-9)”  
Authorised by Martin Härter & Isabelle Scholl (University Medical Center Hamburg-Eppendorf, Germany).
