# Supplementary material
Source: MDPI journal article supplement (https://www.mdpi.com/2813-4524/1/1/4)
Supplement: s1 [file s1 › Supplementary fileS2_english translation of the Japanese version of PREM modified for care provider.pdf]

## Supplementary file S2

### English translation of the Japanese version of PREM modified for care provider

#### Reported experience scale of care staff who provided care to return to living arrangements in medical and rehabilitation facilities

| Questions                                                                                                                          | Answers                                                           |                         |                                         |    |
|------------------------------------------------------------------------------------------------------------------------------------|-------------------------------------------------------------------|-------------------------|-----------------------------------------|----|
|                                                                                                                                    | *Please encircle only <b>one answer</b> that applies best to you. |                         |                                         |    |
| 1. Was the timing of admission to patients reasonable?                                                                             | Yes                                                               |                         | No                                      |    |
| 2. Did you collect all the necessary information about the patient's condition or disease course from the referring care provider? | Yes                                                               | Don't know              | No                                      |    |
| 3. Did you clearly state the goals of the patient care?                                                                            | Yes                                                               | Don't know              | No                                      |    |
| Please describe the patient's goals.<br>( )                                                                                        |                                                                   |                         |                                         |    |
| 4. Did you think about the goals of the home care through discussion with the patient?                                             | Yes<br>- always                                                   | Yes - sometimes         | No                                      |    |
| 5. Were the room or shared area by the patient clean?                                                                              | Very clean                                                        | Fairly clean            | Not very clean                          |    |
| 6. While patient's hospitalization, did the patient experience fear or other unpleasant feelings from other users or visitors?     | Yes                                                               |                         | No                                      |    |
| 7. Did you respond thoroughly to the patient's questions?                                                                          | Yes<br>- always                                                   | Yes - sometimes         | The patient had no questions            | No |
| 8. Did you feel that the patient trusted you?                                                                                      | Yes<br>- always                                                   | Yes<br>- sometimes      | No                                      |    |
| 9. Was the patient involved in the care- and treatment-related decision-making to their satisfaction?                              | Yes                                                               |                         | No                                      |    |
| 10. Was the patient involved in decision-making as to when to back home?                                                           | Yes<br>– definitely                                               | Yes<br>– to some extent | The patient was not need to be involved | No |

## Supplementary file 2

### English translation of the Japanese version of PREM modified for care provider

|                                                                                                                                         |                  |                                         |                                                    |    |            |
|-----------------------------------------------------------------------------------------------------------------------------------------|------------------|-----------------------------------------|----------------------------------------------------|----|------------|
| 11. Did you took account of patient's family or home situation when planning going home?                                                | Yes - definitely | Yes - to some extent                    | No – it did not necessary to take it into account. | No | Don't know |
| 12. Did you sufficiently disclose information related to the patient's care to patient's family and close friends?                      | Yes - definitely | Yes - to some extent                    | The patient did not want or need them to.          | No |            |
| 13. Did you discuss with the patient the need to install assistive devices or medical equipment for medical treatment at the residence? | Yes              | No – it did not necessary to discuss it | No – Discussion did not possible                   |    |            |
| 14. Did you have fully discussed with the patient the need to receive other care and support after the patient is discharged/admitted.  | Yes              | No – it did not necessary to discuss it | No – Discussion did not possible                   |    |            |
| 15. Comprehensively, you provide care with respect to the patient during patient's hospitalization/entry.                               | Yes - always     | Yes - sometimes                         | No                                                 |    |            |
